# Supplementary material for: Quantitative Genetics Model as the Unifying Model for Defining Genomic Relationship and Inbreeding Coefficient
Source: PubMed Central journal article supplement (PMC4269408; doi:10.1371/journal.pone.0114484), 2014-12-17
Supplement: pone.0114484.s003.pdf [file pone.0114484.s003.pdf]

Table S1. Correlations between genomic additive and dominance relationships under Definitions I-IV and pedigree additive relationship measured by '2×(coancestry coefficient)'

A) The Holstein sample

| Definition                   | I      | II     | III   | IV     | V        | VI     | 2×(coancestry coefficient) |
|------------------------------|--------|--------|-------|--------|----------|--------|----------------------------|
| Parent-offspring (239 pairs) |        |        |       |        |          |        |                            |
| I                            | -      | 1.000  | 0.987 | 0.998  | 0.998    | 0.986  | 0.014                      |
| II                           | 1.000  | -      | 0.987 | 0.998  | 0.998    | 0.986  | 0.014                      |
| III                          | 0.9996 | 0.9996 | -     | 0.984  | 0.984    | 0.999  | 0.017                      |
| IV                           | 0.964  | 0.964  | 0.962 | -      | 0.999993 | 0.984  | -0.006                     |
| V                            | 0.964  | 0.964  | 0.962 | 0.997  | -        | 0.984  | -0.006                     |
| VI                           | 0.967  | 0.967  | 0.966 | 0.995  | 0.998    | -      | 0.013                      |
| Full-sibs (48 pairs)         |        |        |       |        |          |        |                            |
| I                            | -      | 1.000  | 0.981 | 0.999  | 0.999    | 0.981  | -0.078                     |
| II                           | 1.000  | -      | 0.981 | 0.999  | 0.999    | 0.981  | -0.078                     |
| III                          | 0.993  | 0.993  | -     | 0.984  | 0.984    | 0.9996 | -0.089                     |
| IV                           | 0.995  | 0.995  | 0.983 | -      | 0.999996 | 0.985  | -0.082                     |
| V                            | 0.996  | 0.996  | 0.984 | 0.9997 | -        | 0.985  | -0.082                     |
| VI                           | 0.992  | 0.992  | 0.998 | 0.986  | 0.988    | -      | -0.083                     |
| Half-sibs (23,941 pairs)     |        |        |       |        |          |        |                            |
| I                            | -      | 1.000  | 0.996 | 0.998  | 0.998    | 0.996  | 0.215                      |
| II                           | 1.000  | -      | 0.996 | 0.998  | 0.998    | 0.996  | 0.215                      |
| III                          | 0.9996 | 0.9996 | -     | 0.993  | 0.994    | 0.999  | 0.212                      |
| IV                           | 0.957  | 0.957  | 0.955 | -      | 0.99999  | 0.995  | 0.213                      |
| V                            | 0.957  | 0.957  | 0.956 | 0.998  | -        | 0.995  | 0.213                      |
| VI                           | 0.959  | 0.959  | 0.960 | 0.995  | 0.998    | -      | 0.216                      |

Upper off-diagonals: correlations between genomic additive relationships and between genomic and pedigree relationships; lower off-diagonals: correlations between genomic dominance relationships.

B) The swine sample

| Definition                    | I     | II    | III   | IV    | V      | VI    | 2×(coancestry coefficient) |
|-------------------------------|-------|-------|-------|-------|--------|-------|----------------------------|
| Parent-offspring (3518 pairs) |       |       |       |       |        |       |                            |
| I                             | -     | 1.000 | 0.922 | 0.989 | 0.990  | 0.896 | 0.073                      |
| II                            | 1.000 | -     | 0.922 | 0.989 | 0.990  | 0.896 | 0.073                      |
| III                           | 0.991 | 0.991 | -     | 0.877 | 0.884  | 0.987 | 0.207                      |
| IV                            | 0.930 | 0.930 | 0.897 | -     | 0.9995 | 0.862 | 0.019                      |
| V                             | 0.962 | 0.962 | 0.945 | 0.981 | -      | 0.871 | 0.028                      |
| VI                            | 0.948 | 0.948 | 0.961 | 0.928 | 0.975  | -     | 0.204                      |
| Full-sibs (1441 pairs)        |       |       |       |       |        |       |                            |
| I                             | -     | 1.000 | 0.882 | 0.989 | 0.991  | 0.865 | 0.073                      |
| II                            | 1.000 | -     | 0.882 | 0.989 | 0.991  | 0.865 | 0.073                      |
| III                           | 0.935 | 0.935 | -     | 0.827 | 0.840  | 0.995 | 0.111                      |
| IV                            | 0.898 | 0.898 | 0.739 | -     | 0.9993 | 0.815 | 0.033                      |
| V                             | 0.946 | 0.946 | 0.829 | 0.978 | -      | 0.829 | 0.043                      |
| VI                            | 0.888 | 0.888 | 0.955 | 0.776 | 0.861  | -     | 0.114                      |
| Half-sibs (23,628 pairs)      |       |       |       |       |        |       |                            |
| I                             | -     | 1.000 | 0.962 | 0.992 | 0.994  | 0.952 | 0.168                      |
| II                            | 1.000 | -     | 0.962 | 0.992 | 0.994  | 0.952 | 0.168                      |
| III                           | 0.991 | 0.991 | -     | 0.933 | 0.942  | 0.995 | 0.247                      |
| IV                            | 0.915 | 0.915 | 0.880 | -     | 0.9994 | 0.929 | 0.130                      |
| V                             | 0.955 | 0.955 | 0.936 | 0.981 | -      | 0.939 | 0.141                      |
| VI                            | 0.948 | 0.948 | 0.959 | 0.928 | 0.974  | -     | 0.246                      |

Upper off-diagonals: correlations between genomic additive relationships and between genomic and pedigree relationships; lower off-diagonals: correlations between genomic dominance relationships.
