# Supplementary material for: Quantitative Genetics Model as the Unifying Model for Defining Genomic Relationship and Inbreeding Coefficient
Source: PubMed Central journal article supplement (PMC4269408; doi:10.1371/journal.pone.0114484), 2014-12-17
Supplement: pone.0114484.s004.pdf [file pone.0114484.s004.pdf]

Table S2 Correlations of breeding values, dominance deviations and total genetic values under different genomic relationship definitions for Traits 3 and 5 of the swine sample

| Trait     |           | Definition | II    | III   | IV    | V      | VI      |       |
|-----------|-----------|------------|-------|-------|-------|--------|---------|-------|
| 3         | Additive  | I          | 1.000 | 0.999 | 0.997 | 0.998  | 0.997   |       |
|           |           | II         |       | 0.999 | 0.997 | 0.998  | 0.997   |       |
|           |           | III        |       |       | 0.995 | 0.996  | 0.998   |       |
|           |           | IV         |       |       |       | 0.9995 | 0.997   |       |
|           |           | V          |       |       |       |        | 0.998   |       |
|           | Dominance | I          | 1.000 | 0.993 | 0.953 | 0.972  | 0.972   |       |
|           |           | II         |       | 0.993 | 0.953 | 0.972  | 0.972   |       |
|           |           | III        |       |       | 0.926 | 0.953  | 0.974   |       |
|           |           | IV         |       |       |       | 0.993  | 0.963   |       |
|           |           | V          |       |       |       |        | 0.982   |       |
|           | Genotypic | I          | 1.000 | 0.994 | 0.991 | 0.995  | 0.993   |       |
|           |           | II         |       | 0.994 | 0.991 | 0.995  | 0.993   |       |
|           |           | III        |       |       | 0.974 | 0.981  | 0.998   |       |
|           |           | IV         |       |       |       | 0.999  | 0.979   |       |
|           |           | V          |       |       |       |        | 0.986   |       |
|           | 5         | Additive   | I     | 1.000 | 0.999 | 0.998  | 0.998   | 0.998 |
|           |           |            | II    |       | 0.999 | 0.998  | 0.998   | 0.998 |
|           |           |            | III   |       |       | 0.998  | 0.998   | 0.998 |
|           |           |            | IV    |       |       |        | 0.99992 | 0.999 |
|           |           |            | V     |       |       |        |         | 0.999 |
| Dominance |           | I          | 1.000 | 0.997 | 0.965 | 0.979  | 0.977   |       |
|           |           | II         |       | 0.997 | 0.965 | 0.979  | 0.977   |       |
|           |           | III        |       |       | 0.957 | 0.974  | 0.981   |       |
|           |           | IV         |       |       |       | 0.995  | 0.980   |       |
|           |           | V          |       |       |       |        | 0.990   |       |
| Total     |           | I          | 1.000 | 0.999 | 0.998 | 0.999  | 0.998   |       |
|           |           | II         |       | 0.999 | 0.998 | 0.999  | 0.998   |       |
|           |           | III        |       |       | 0.996 | 0.997  | 0.999   |       |
|           |           | IV         |       |       |       | 0.9998 | 0.998   |       |
|           |           | V          |       |       |       |        | 0.999   |       |
